# Supplementary material for: A catalyzed E/Z isomerization mechanism of stilbene using para-benzoquinone as a triplet sensitizer
Source: Royal Society of Chemistry journal article supplement (doi:10.1039/d1cp04672a), 2021-12-11
Supplement: d1cp04672a1.pdf [file d1cp04672a1.pdf]

## Supporting Information

### Catalyzed *E/Z* isomerization mechanism of stilbene using *para*-benzoquinone as a triplet sensitizer

Kaho Nakatani,<sup>1</sup> Hirofumi Sato,<sup>1</sup> Ryoichi Fukuda<sup>1,2,\*</sup>

<sup>1</sup>Department of Molecular Engineering, Graduate School of Engineering, Kyoto University, Kyoto-Daigaku-Katsura, Nishikyo-ku, Kyoto 615-8510, Japan

<sup>2</sup>Center for the Promotion of Interdisciplinary Education and Research, Elements Strategy Initiative for Catalysts and Batteries (ESICB), Kyoto University, 1-30 Goryo-Ohara, Nishikyo-ku, Kyoto 615-8245, Japan

#### CONTENTS

**Table S1. Absolute energies**

**Table S2. Selected structural parameters of relevant compounds**

**Figure S1. Numberings of atoms in Table S2**

**Table S3. Results with  $\omega$ B97XD and M06-2x.**

**Figure S2. Three dimensional structures of the intermediate species**

**Cartesian Coordinates**

**Table S1.** Absolute energy values of the considered systems (in Hartree): the total energy ( $E_{\text{tot}}$ ), zero-point energy (ZPE), solvation energy ( $\Delta E_{\text{solv}}$ ), and their sum.

| System                                                    | $E_{\text{tot}}$ | ZPE      | $\Delta E_{\text{solv}}$ | $E_{\text{tot}} + \text{ZPE} + \Delta E_{\text{solv}}$ |
|-----------------------------------------------------------|------------------|----------|--------------------------|--------------------------------------------------------|
| 1 PBQ ( $S_0$ state)                                      | -381.561791      | 0.084550 | -0.004356                | -381.481597                                            |
| 2 PBQ ( $T_1$ state)                                      | -381.488777      | 0.081675 | -0.004419                | -381.411521                                            |
| 3 PBQ (anion doublet state)                               | -381.641648      | 0.082785 | -0.046629                | -381.605492                                            |
| 4 Stilbene ( $S_0$ , ( $E$ )-form)                        | -540.846680      | 0.213896 | -0.002502                | -540.635286                                            |
| 5 Stilbene ( $S_0$ , ( $Z$ )-form)                        | -540.839204      | 0.214117 | -0.002031                | -540.627118                                            |
| 6 Stilbene ( $S_0$ , ( $tw$ )-form) <sup>a</sup>          | -540.793127      | 0.213181 | -0.002134                | -540.582080                                            |
| 7 Stilbene ( $T_1$ , ( $E$ )-form) <sup>b</sup>           | -540.769533      | 0.210292 | -0.002417                | -540.561658                                            |
| 8 Stilbene ( $T_1$ , ( $Z$ )-form) <sup>c</sup>           | -540.757904      | 0.210573 | -0.001988                | -540.549319                                            |
| 9 Stilbene ( $T_1$ , ( $tw$ )-form)                       | -540.774086      | 0.210138 | -0.002036                | -540.565984                                            |
| 10 Stilbene (cation doublet, ( $E$ )-form)                | -540.580033      | 0.214480 | -0.035838                | -540.401391                                            |
| 11 Stilbene (cation doublet, ( $Z$ )-form)                | -540.568017      | 0.214537 | -0.035897                | -540.389377                                            |
| 12 Stilbene (cation doublet, ( $tw$ )-form) <sup>a</sup>  | -540.542088      | 0.213077 | -0.036200                | -540.365211                                            |
| 13 ( $E$ )-form encounter complex ( $S_0$ )               | -922.411590      | 0.299040 | -0.005481                | -922.118031                                            |
| 14 ( $Z$ )-form encounter complex ( $S_0$ )               | -922.403502      | 0.299360 | -0.005314                | -922.109456                                            |
| 15 ( $E$ )-form encounter complex ( $T_1$ )               | -922.347668      | 0.297802 | -0.009783                | -922.059649                                            |
| 16 ( $Z$ )-form encounter complex ( $T_1$ )               | -922.339233      | 0.297963 | -0.009034                | -922.050304                                            |
| 17 <b><math>E</math>-XP</b> ( $T_1$ )                     | -922.367493      | 0.299957 | -0.006533                | -922.074069                                            |
| 18 <b><math>Z</math>-XP</b> ( $T_1$ )                     | -922.364099      | 0.299983 | -0.006448                | -922.070564                                            |
| 19 <b><math>tw</math>-XP</b> ( $T_1$ )                    | -922.367224      | 0.299857 | -0.006601                | -922.073968                                            |
| 20 <b>TS1</b> ( $T_1$ )                                   | -922.345246      | 0.297762 | -0.010130                | -922.057614                                            |
| 21 <b>TS2</b> ( $T_1$ )                                   | -922.339010      | 0.298003 | -0.009156                | -922.050163                                            |
| 22 <b>TS3</b> ( $T_1$ )                                   | -922.359142      | 0.300048 | -0.006415                | -922.065509                                            |
| 23 <b>TS4</b> ( $T_1$ )                                   | -922.363984      | 0.299630 | -0.006840                | -922.071194                                            |
| 24 <b>TS5</b> ( $T_1$ )                                   | -922.359884      | 0.299691 | -0.006379                | -922.066572                                            |
| 25 <b>CP1</b> ( $S_0$ )                                   | -922.345967      | 0.298465 | -0.007213                | -922.054715                                            |
| 26 <b>CP1</b> ( $T_1$ )                                   | -922.345967      | 0.297289 | -0.007455                | -922.056133                                            |
| 27 <b>CP2</b> ( $S_0$ )                                   | -922.339819      | 0.299732 | -0.007620                | -922.047707                                            |
| 28 <b>CP2</b> ( $T_1$ )                                   | -922.339820      | 0.299107 | -0.006119                | -922.046832                                            |
| 29 <b><math>E</math>-OX</b> ( $S_0$ )                     | -922.386483      | 0.303382 | -0.006117                | -922.089218                                            |
| 30 <b><math>E</math>-OX</b> ( $T_1$ )                     | -922.293345      | 0.299671 | -0.004384                | -921.998058                                            |
| 31 <b><math>Z</math>-OX</b> ( $S_0$ )                     | -922.381624      | 0.303508 | -0.005908                | -922.084024                                            |
| 32 <b><math>Z</math>-OX</b> ( $T_1$ )                     | -922.288656      | 0.299963 | -0.004127                | -921.992820                                            |
| 33 Diacetyl ( $S_0$ state)                                | -306.571692      | 0.092618 | -0.003400                | -306.482474                                            |
| 34 Diacetyl ( $T_1$ state)                                | -306.495909      | 0.090904 | -0.002537                | -306.407542                                            |
| 35 Diacetyl (anion doublet state)                         | -306.607756      | 0.090749 | -0.050026                | -306.567033                                            |
| 36 ( $E$ )-form encounter complex with diacetyl ( $T_1$ ) | -847.345064      | 0.305263 | -0.003981                | -847.043782                                            |
| 37 <b>TS</b> : ( $E$ )-form with diacetyl ( $T_1$ )       | -847.330445      | 0.305676 | -0.007341                | -847.032110                                            |
| 38 Exciplex: ( $E$ )-form with diacetyl ( $T_1$ )         | -847.348632      | 0.308244 | -0.005857                | -847.046245                                            |
| 39 Oxetane: ( $E$ )-form with diacetyl ( $T_1$ )          | -847.284242      | 0.309293 | -0.003742                | -846.978691                                            |

<sup>a</sup> The maximum energy structure with respect to the central-bond torsion; other coordinates was relaxed.

<sup>b</sup>Involving one imaginary frequency mode with  $18.2i \text{ cm}^{-1}$ .

<sup>c</sup>The dihedral angle for the central-bond torsion was fixed at the  $S_0$  state value of ( $Z$ )-form.

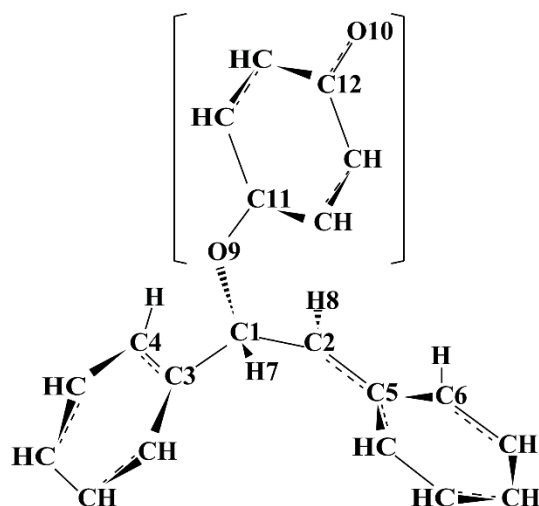

**Figure S1.** Numberings of atoms used in Table S2.

**Table S2.** Selected structural parameters of relevant compounds.

| System (state)                          | Bond length / Å |       |       |       | Dihedral angle / degree |           |
|-----------------------------------------|-----------------|-------|-------|-------|-------------------------|-----------|
|                                         | C1C2            | C1C3  | C2C5  | C1O9  | C3C1C2C5                | C2C1O9C11 |
| <i>(E)</i> -Stilbene ( $S_0$ )          | 1.345           | 1.466 | 1.466 |       | 180.0                   |           |
| <i>(tw)</i> -Stilbene ( $S_0$ )         | 1.382           | 1.466 | 1.466 |       | 92.0                    |           |
| <i>(Z)</i> -Stilbene ( $S_0$ )          | 1.346           | 1.475 | 1.475 |       | 6.4                     |           |
| <i>(E)</i> -Stilbene ( $T_1$ )          | 1.462           | 1.395 | 1.395 |       | 180.0 <sup>a</sup>      |           |
| <i>(tw)</i> -Stilbene ( $T_1$ )         | 1.466           | 1.416 | 1.416 |       | 90.6                    |           |
| <i>(Z)</i> -Stilbene ( $T_1$ )          | 1.474           | 1.403 | 1.403 |       | 6.4 <sup>b</sup>        |           |
| <i>(E)</i> -Stilbene (cation)           | 1.387           | 1.424 | 1.424 |       | 180.0                   |           |
| <i>(tw)</i> -Stilbene (cation)          | 1.422           | 1.412 | 1.412 |       | 93.0                    |           |
| <i>(Z)</i> -Stilbene (cation)           | 1.392           | 1.427 | 1.427 |       | 23.8                    |           |
| <b><i>E</i>-XP</b> ( $T_1$ )            | 1.496           | 1.518 | 1.414 | 1.466 | -152.9                  | -160.3    |
| <b><i>tw</i>-XP</b> ( $T_1$ )           | 1.497           | 1.519 | 1.413 | 1.456 | -103.8                  | -75.1     |
| <b><i>Z</i>-XP</b> ( $T_1$ )            | 1.500           | 1.527 | 1.414 | 1.464 | 78.6                    | -73.2     |
| <i>(E)</i> -Encounter complex ( $T_1$ ) | 1.370           | 1.446 | 1.454 | 2.800 | -174.9                  | -111.3    |
| <i>(Z)</i> -Encounter complex ( $T_1$ ) | 1.376           | 1.462 | 1.452 | 2.400 | 17.2                    | -92.5     |
| <b>TS1</b> ( $T_1$ )                    | 1.394           | 1.459 | 1.438 | 2.114 | -162.2                  | -110.8    |
| <b>TS2</b> ( $T_1$ )                    | 1.389           | 1.469 | 1.445 | 2.197 | 26.4                    | -88.2     |
| <b>TS3</b> ( $T_1$ )                    | 1.503           | 1.515 | 1.416 | 1.469 | 5.6                     | -81.7     |
| <b>TS4</b> ( $T_1$ )                    | 1.494           | 1.520 | 1.412 | 1.463 | -115.1                  | -120.6    |
| <b>TS5</b> ( $T_1$ )                    | 1.501           | 1.523 | 1.414 | 1.456 | 143.7                   | -120.0    |
| <b>CP1</b> ( $S_0$ )                    | 1.458           | 1.471 | 1.412 | 1.716 | -162.6                  | 92.1      |
| <b>CP2</b> ( $S_0$ )                    | 1.482           | 1.507 | 1.404 | 1.572 | 63.9                    | 70.0      |
| <b><i>E</i>-OX</b> ( $T_1$ )            | 1.548           | 1.506 | 1.503 | 1.448 | 109.1                   | 9.0       |
| <b><i>E</i>-OX</b> ( $S_0$ )            | 1.552           | 1.505 | 1.503 | 1.451 | 107.4                   | 10.8      |
| <b><i>Z</i>-OX</b> ( $T_1$ )            | 1.533           | 1.509 | 1.504 | 1.445 | 6.3                     | -1.6      |
| <b><i>Z</i>-OX</b> ( $S_0$ )            | 1.568           | 1.506 | 1.505 | 1.447 | -1.0                    | 4.2       |

<sup>a</sup>One imaginary frequency mode is involved. <sup>b</sup>Fixed dihedral angle.

**Table S3.** Relative energies (kcal mol<sup>-1</sup>) calculated with B3LYP, ωB97XD and M06-2x.

| System (state)                                                 | B3LYP | ωB97XD | M06-2x |
|----------------------------------------------------------------|-------|--------|--------|
| <i>(E)</i> -Stilbene (S <sub>0</sub> ) + PBQ (T <sub>1</sub> ) | 0.0   | 0.0    | 0.0    |
| <i>(E)</i> -Encounter complex (T <sub>1</sub> )                | -8.1  | -9.0   | -7.5   |
| <b>TS1</b> (T <sub>1</sub> )                                   | -6.8  | -8.9   | -6.9   |
| <b><i>E-XP</i></b> (T <sub>1</sub> )                           | -17.1 | -28.3  | -28.9  |

**Figure S2.** Three dimensional structures of the intermediate species.

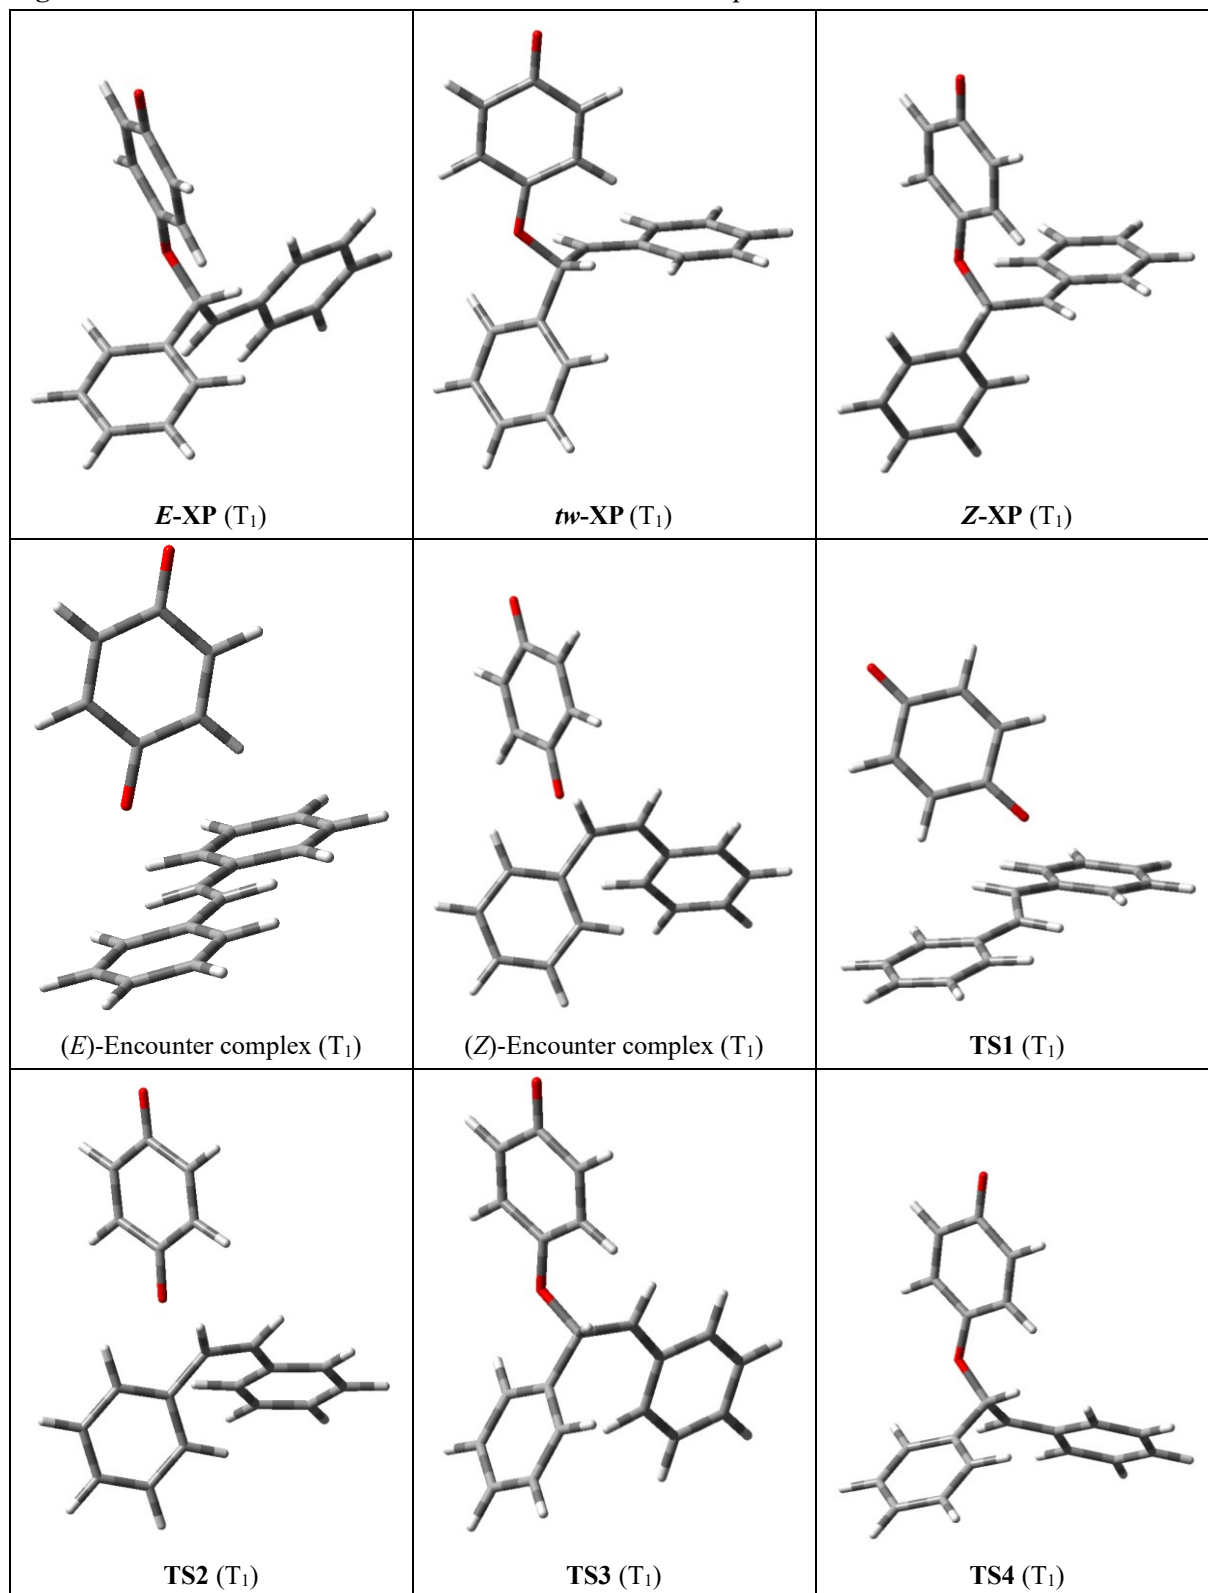

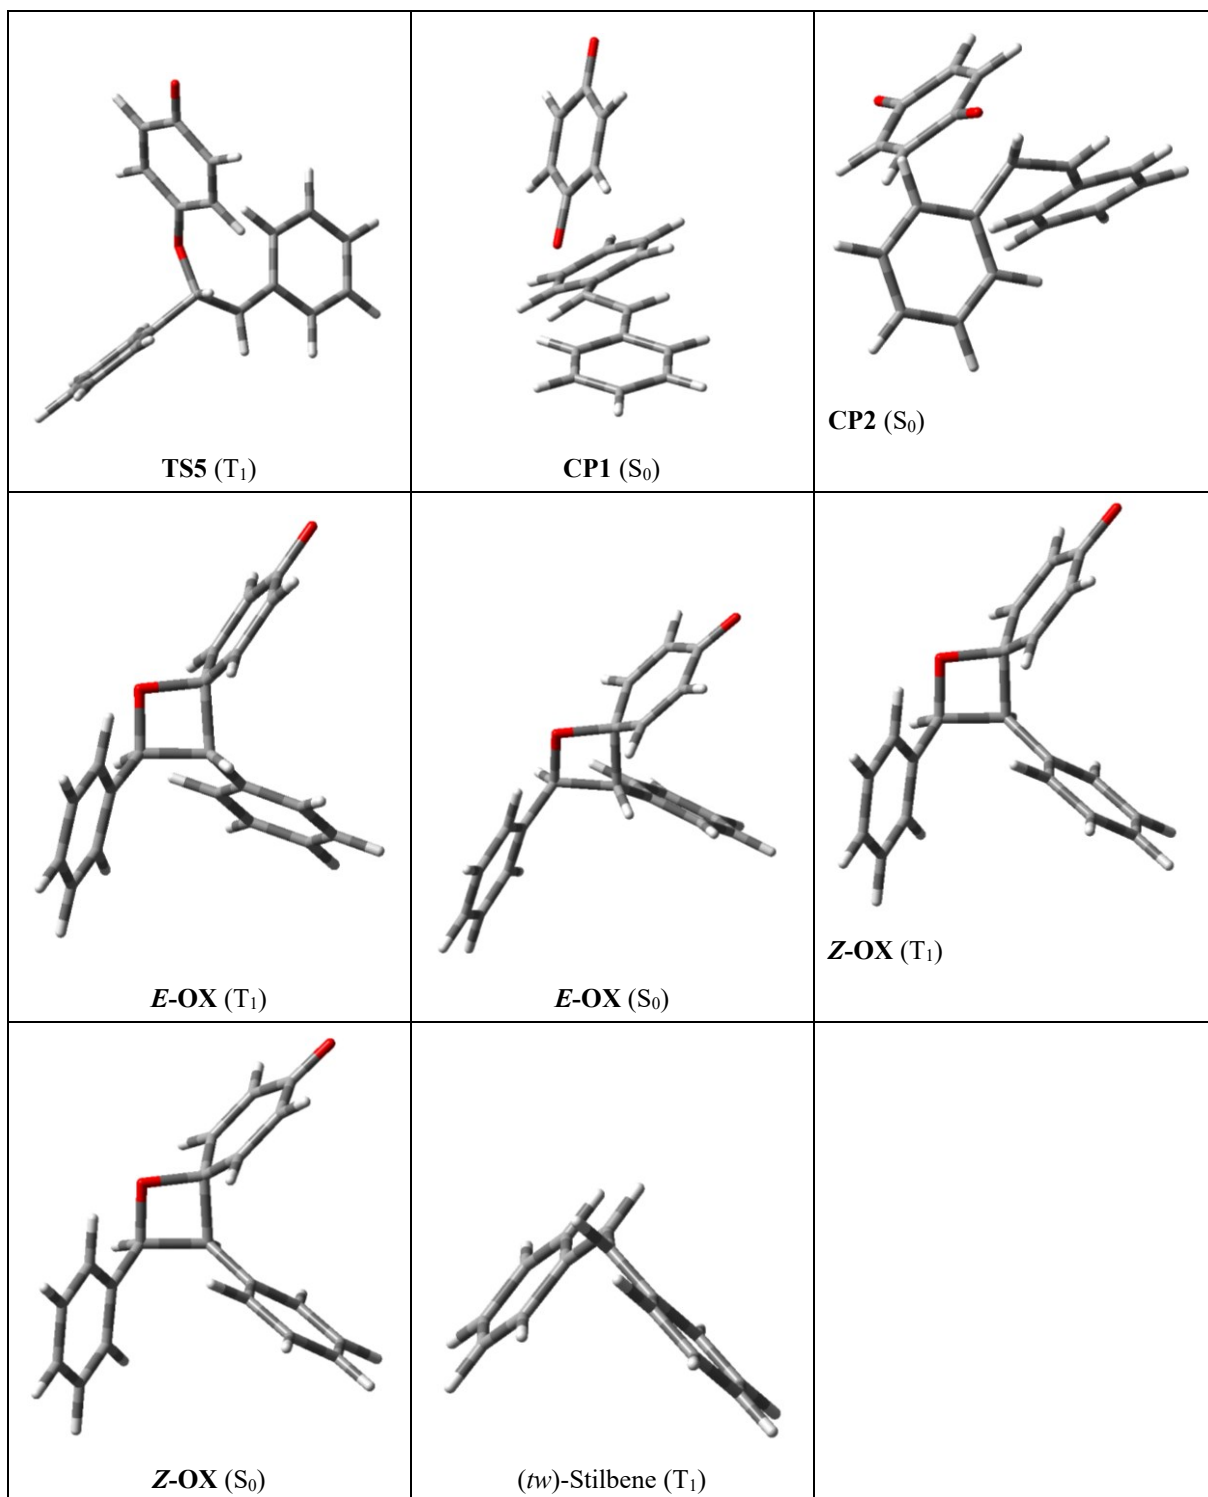

## Cartesian Coordinates (in Å)

### 1. PBQ (S0 state)

|   | X         | Y         | Z         |
|---|-----------|-----------|-----------|
| O | 0.000000  | -0.000000 | 2.662245  |
| O | 0.000000  | -0.000000 | -2.662245 |
| C | 0.000000  | -0.000000 | 1.442568  |
| C | 0.000000  | 1.269007  | 0.669693  |
| C | -0.000000 | -1.269007 | 0.669693  |
| C | 0.000000  | 1.269007  | -0.669693 |
| C | -0.000000 | -1.269007 | -0.669693 |
| C | 0.000000  | -0.000000 | -1.442568 |
| H | 0.000000  | 2.181751  | 1.255199  |
| H | -0.000000 | -2.181751 | 1.255199  |
| H | 0.000000  | 2.181751  | -1.255199 |
| H | -0.000000 | -2.181751 | -1.255199 |

### 2. PBQ (T1 state)

|   | X         | Y         | Z         |
|---|-----------|-----------|-----------|
| O | 0.000000  | -0.000000 | 2.698930  |
| O | 0.000000  | 0.000000  | -2.694229 |
| C | 0.000000  | -0.000000 | 1.398614  |
| C | 0.000000  | 1.241450  | 0.691180  |
| C | -0.000000 | -1.241450 | 0.691180  |
| C | 0.000000  | 1.231022  | -0.676217 |
| C | -0.000000 | -1.231022 | -0.676217 |
| C | 0.000000  | 0.000000  | -1.444991 |
| H | 0.000000  | 2.160841  | 1.262162  |
| H | -0.000000 | -2.160841 | 1.262162  |
| H | 0.000000  | 2.162165  | -1.231613 |
| H | -0.000000 | -2.162165 | -1.231613 |

### 3. PBQ (anion doublet state)

|   | X         | Y         | Z         |
|---|-----------|-----------|-----------|
| O | 0.000000  | 0.000000  | 2.732766  |
| O | 0.000000  | -0.000000 | -2.732657 |
| C | 0.000000  | 0.000000  | 1.466139  |
| C | -0.000000 | 1.221371  | 0.685347  |
| C | -0.000000 | -1.221371 | 0.685347  |
| C | -0.000000 | 1.222062  | -0.685266 |
| C | -0.000000 | -1.222062 | -0.685266 |
| C | 0.000000  | -0.000000 | -1.466379 |
| H | -0.000000 | 2.153461  | 1.245337  |
| H | -0.000000 | -2.153461 | 1.245337  |
| H | -0.000000 | 2.153870  | -1.245538 |
| H | -0.000000 | -2.153870 | -1.245538 |

### 4. Stilbene (S0, (E)-form)

|   | X         | Y         | Z         |
|---|-----------|-----------|-----------|
| C | -0.497168 | -0.453238 | -0.000083 |
| C | 0.497159  | 0.453196  | 0.000032  |
| H | -0.241248 | -1.509580 | -0.000239 |
| H | 0.241247  | 1.509539  | 0.000148  |
| C | -1.938449 | -0.186191 | -0.000039 |
| C | -2.491330 | 1.107820  | 0.000093  |
| C | -2.826600 | -1.275566 | -0.000138 |
| C | -3.867275 | 1.297401  | 0.000123  |
| H | -1.841638 | 1.975037  | 0.000161  |
| C | -4.205732 | -1.086565 | -0.000097 |
| H | -2.424186 | -2.283506 | -0.000240 |
| C | -4.734142 | 0.202140  | 0.000036  |
| H | -4.268791 | 2.304811  | 0.000226  |
| H | -4.866820 | -1.946112 | -0.000180 |
| H | -5.807354 | 0.354568  | 0.000062  |

|   |          |           |           |
|---|----------|-----------|-----------|
| C | 1.938439 | 0.186163  | 0.000031  |
| C | 2.826569 | 1.275553  | -0.000108 |
| C | 2.491357 | -1.107833 | 0.000173  |
| C | 4.205712 | 1.086590  | -0.000137 |
| H | 2.424142 | 2.283488  | -0.000197 |
| C | 3.867302 | -1.297378 | 0.000136  |
| H | 1.841700 | -1.975079 | 0.000328  |
| C | 4.734153 | -0.202097 | -0.000024 |
| H | 4.866762 | 1.946167  | -0.000256 |
| H | 4.268846 | -2.304778 | 0.000247  |
| H | 5.807365 | -0.354521 | -0.000055 |

#### 5. Stilbene (S0, (Z)-form)

|   | X         | Y         | Z         |
|---|-----------|-----------|-----------|
| C | -0.672985 | 1.848702  | 0.006019  |
| C | 0.672923  | 1.848613  | -0.006008 |
| H | -1.145190 | 2.828313  | -0.028937 |
| H | 1.145232  | 2.828198  | 0.028800  |
| C | -1.631352 | 0.729368  | 0.077291  |
| C | -1.399210 | -0.425533 | 0.841729  |
| C | -2.863190 | 0.845117  | -0.587223 |
| C | -2.352937 | -1.435656 | 0.913992  |
| H | -0.471520 | -0.524138 | 1.391493  |
| C | -3.813448 | -0.170552 | -0.524466 |
| H | -3.071196 | 1.740376  | -1.164443 |
| C | -3.560926 | -1.317849 | 0.225392  |
| H | -2.156268 | -2.315520 | 1.516725  |
| H | -4.753032 | -0.062637 | -1.055004 |
| H | -4.301861 | -2.107201 | 0.283016  |
| C | 1.631295  | 0.729281  | -0.077279 |
| C | 2.863191  | 0.845175  | 0.587102  |
| C | 1.399155  | -0.425699 | -0.841595 |
| C | 3.813512  | -0.170435 | 0.524339  |
| H | 3.071196  | 1.740501  | 1.164216  |
| C | 2.352947  | -1.435762 | -0.913866 |
| H | 0.471410  | -0.524432 | -1.391245 |
| C | 3.560999  | -1.317811 | -0.225402 |
| H | 4.753138  | -0.062403 | 1.054777  |
| H | 2.156273  | -2.315691 | -1.516503 |
| H | 4.301988  | -2.107110 | -0.283043 |

#### 6. Stilbene (S0, (tw)-form)

|   | X         | Y         | Z         |
|---|-----------|-----------|-----------|
| C | -0.599962 | -1.224253 | 0.342387  |
| C | 0.599962  | -1.224253 | -0.342388 |
| H | -0.900236 | -2.258512 | 0.536841  |
| H | 0.900237  | -2.258512 | -0.536842 |
| C | -1.842294 | -0.470049 | 0.152137  |
| C | -1.891206 | 0.747084  | -0.557790 |
| C | -3.048843 | -0.984519 | 0.660930  |
| C | -3.097667 | 1.399848  | -0.772114 |
| H | -0.975904 | 1.158326  | -0.968793 |
| C | -4.255523 | -0.326260 | 0.449243  |
| H | -3.033607 | -1.917713 | 1.214527  |
| C | -4.287826 | 0.868773  | -0.268404 |
| H | -3.114737 | 2.324844  | -1.338091 |
| H | -5.173572 | -0.748512 | 0.842658  |
| H | -5.229183 | 1.377823  | -0.440635 |
| C | 1.842294  | -0.470049 | -0.152138 |
| C | 3.048843  | -0.984519 | -0.660930 |
| C | 1.891206  | 0.747085  | 0.557789  |
| C | 4.255523  | -0.326260 | -0.449242 |
| H | 3.033607  | -1.917713 | -1.214527 |
| C | 3.097667  | 1.399848  | 0.772114  |
| H | 0.975904  | 1.158326  | 0.968792  |



|   |          |           |           |
|---|----------|-----------|-----------|
| C | 4.287826 | 0.868773  | 0.268405  |
| H | 5.173572 | -0.748512 | -0.842657 |
| H | 3.114736 | 2.324844  | 1.338091  |
| H | 5.229183 | 1.377823  | 0.440636  |

7. Stilbene (Tl, (E)-form)

|   | X         | Y         | Z         |
|---|-----------|-----------|-----------|
| C | 0.535465  | 0.497530  | -0.000062 |
| C | -0.535465 | -0.497530 | -0.000059 |
| H | 0.251870  | 1.543526  | -0.000104 |
| H | -0.251870 | -1.543526 | -0.000091 |
| C | 1.903076  | 0.221470  | -0.000024 |
| C | 2.448486  | -1.109687 | 0.000038  |
| C | 2.850778  | 1.304153  | -0.000046 |
| C | 3.813543  | -1.319927 | 0.000074  |
| H | 1.782539  | -1.962647 | 0.000060  |
| C | 4.206791  | 1.074469  | -0.000010 |
| H | 2.471421  | 2.320727  | -0.000093 |
| C | 4.709824  | -0.241525 | 0.000051  |
| H | 4.196776  | -2.334658 | 0.000122  |
| H | 4.894944  | 1.912679  | -0.000029 |
| H | 5.778725  | -0.418064 | 0.000078  |
| C | -1.903076 | -0.221470 | -0.000027 |
| C | -2.850778 | -1.304153 | -0.000042 |
| C | -2.448486 | 1.109687  | 0.000023  |
| C | -4.206791 | -1.074469 | -0.000011 |
| H | -2.471421 | -2.320727 | -0.000079 |
| C | -3.813543 | 1.319927  | 0.000054  |
| H | -1.782539 | 1.962647  | 0.000039  |
| C | -4.709824 | 0.241525  | 0.000037  |
| H | -4.894944 | -1.912679 | -0.000024 |
| H | -4.196776 | 2.334658  | 0.000092  |
| H | -5.778725 | 0.418064  | 0.000061  |

8. Stilbene (Tl, (Z)-form)

|   | X         | Y         | Z         |
|---|-----------|-----------|-----------|
| C | -0.056597 | 0.733697  | 1.768326  |
| C | 0.056597  | -0.733697 | 1.768326  |
| H | 0.229018  | 1.171147  | 2.724293  |
| H | -0.229018 | -1.171147 | 2.724293  |
| C | -0.186884 | 1.663480  | 0.726017  |
| C | -0.754135 | 1.365970  | -0.559452 |
| C | 0.175192  | 3.033277  | 0.965257  |
| C | -0.874265 | 2.344446  | -1.529402 |
| H | -1.129820 | 0.371384  | -0.754685 |
| C | 0.056597  | 3.992263  | -0.015826 |
| H | 0.577147  | 3.297936  | 1.937592  |
| C | -0.460471 | 3.659475  | -1.281323 |
| H | -1.312011 | 2.091471  | -2.489105 |
| H | 0.362498  | 5.012296  | 0.189462  |
| H | -0.556136 | 4.418009  | -2.049135 |
| C | 0.186884  | -1.663480 | 0.726017  |
| C | -0.175192 | -3.033277 | 0.965257  |
| C | 0.754135  | -1.365970 | -0.559452 |
| C | -0.056597 | -3.992263 | -0.015826 |
| H | -0.577147 | -3.297936 | 1.937592  |
| C | 0.874265  | -2.344446 | -1.529402 |
| H | 1.129820  | -0.371384 | -0.754685 |
| C | 0.460471  | -3.659475 | -1.281323 |
| H | -0.362498 | -5.012296 | 0.189462  |
| H | 1.312011  | -2.091471 | -2.489105 |
| H | 0.556136  | -4.418009 | -2.049135 |

## 9. Stilbene (Tl, (tw)-form)

|   | X         | Y         | Z         |
|---|-----------|-----------|-----------|
| C | 0.227553  | 0.696676  | 1.394305  |
| C | -0.227553 | -0.696676 | 1.394305  |
| H | 0.999172  | 0.972723  | 2.113554  |
| H | -0.999172 | -0.972723 | 2.113554  |
| C | -0.295417 | 1.732943  | 0.583749  |
| C | -1.312842 | 1.500315  | -0.384714 |
| C | 0.190187  | 3.065802  | 0.715537  |
| C | -1.806119 | 2.535583  | -1.161238 |
| H | -1.697577 | 0.494709  | -0.509316 |
| C | -0.310710 | 4.090994  | -0.066910 |
| H | 0.965433  | 3.269097  | 1.447146  |
| C | -1.312842 | 3.837015  | -1.012114 |
| H | -2.581358 | 2.334393  | -1.892642 |
| H | 0.075342  | 5.097380  | 0.053268  |
| H | -1.702893 | 4.642269  | -1.623694 |
| C | 0.295417  | -1.732943 | 0.583749  |
| C | -0.190187 | -3.065802 | 0.715537  |
| C | 1.312842  | -1.500315 | -0.384714 |
| C | 0.310710  | -4.090994 | -0.066910 |
| H | -0.965433 | -3.269097 | 1.447146  |
| C | 1.806119  | -2.535583 | -1.161238 |
| H | 1.697577  | -0.494709 | -0.509316 |
| C | 1.312842  | -3.837015 | -1.012114 |
| H | -0.075342 | -5.097380 | 0.053268  |
| H | 2.581358  | -2.334393 | -1.892642 |
| H | 1.702893  | -4.642269 | -1.623694 |

## 10. Stilbene (cation doublet, (E)-form)

|   | X         | Y         | Z         |
|---|-----------|-----------|-----------|
| C | 0.512456  | 0.467232  | -0.000001 |
| C | -0.512456 | -0.467232 | 0.000002  |
| H | 0.247089  | 1.519597  | -0.000006 |
| H | -0.247089 | -1.519597 | 0.000006  |
| C | 1.908927  | 0.191062  | 0.000001  |
| C | 2.452636  | -1.126204 | 0.000016  |
| C | 2.809190  | 1.294901  | -0.000010 |
| C | 3.817759  | -1.316959 | 0.000019  |
| H | 1.798813  | -1.988849 | 0.000027  |
| C | 4.174710  | 1.094423  | -0.000008 |
| H | 2.407068  | 2.301742  | -0.000021 |
| C | 4.683946  | -0.211310 | 0.000006  |
| H | 4.225399  | -2.320266 | 0.000030  |
| H | 4.850913  | 1.940199  | -0.000018 |
| H | 5.756042  | -0.370312 | 0.000008  |
| C | -1.908927 | -0.191062 | -0.000002 |
| C | -2.809190 | -1.294901 | -0.000006 |
| C | -2.452636 | 1.126204  | 0.000001  |
| C | -4.174710 | -1.094423 | -0.000009 |
| H | -2.407068 | -2.301742 | -0.000007 |
| C | -3.817759 | 1.316959  | -0.000002 |
| H | -1.798813 | 1.988849  | 0.000006  |
| C | -4.683946 | 0.211310  | -0.000007 |
| H | -4.850913 | -1.940199 | -0.000013 |
| H | -4.225399 | 2.320266  | -0.000000 |
| H | -5.756042 | 0.370312  | -0.000010 |

## 11. Stilbene (cation doublet, (Z)-form)

|   | X         | Y         | Z        |
|---|-----------|-----------|----------|
| C | 0.104574  | 0.688165  | 1.735148 |
| C | -0.104574 | -0.688165 | 1.735148 |
| H | 0.316483  | 1.105024  | 2.717621 |
| H | -0.316483 | -1.105024 | 2.717621 |
| C | 0.029351  | 1.656855  | 0.690148 |

|   |           |           |           |
|---|-----------|-----------|-----------|
| C | -0.664271 | 1.445820  | -0.536257 |
| C | 0.604786  | 2.937021  | 0.931400  |
| C | -0.727493 | 2.448218  | -1.482901 |
| H | -1.185487 | 0.513212  | -0.705819 |
| C | 0.560261  | 3.923288  | -0.033484 |
| H | 1.102782  | 3.121522  | 1.876546  |
| C | -0.104574 | 3.682275  | -1.244011 |
| H | -1.274770 | 2.290420  | -2.404134 |
| H | 1.024523  | 4.884686  | 0.148020  |
| H | -0.158119 | 4.464368  | -1.992491 |
| C | -0.029351 | -1.656855 | 0.690148  |
| C | -0.604786 | -2.937021 | 0.931400  |
| C | 0.664271  | -1.445820 | -0.536257 |
| C | -0.560261 | -3.923288 | -0.033484 |
| H | -1.102782 | -3.121522 | 1.876546  |
| C | 0.727493  | -2.448218 | -1.482901 |
| H | 1.185487  | -0.513212 | -0.705819 |
| C | 0.104574  | -3.682275 | -1.244011 |
| H | -1.024523 | -4.884686 | 0.148020  |
| H | 1.274770  | -2.290420 | -2.404134 |
| H | 0.158119  | -4.464368 | -1.992491 |

12. Stilbene (cation doublet, (tw)-form)

|   | X         | Y         | Z         |
|---|-----------|-----------|-----------|
| C | -0.610504 | 0.364756  | 1.362645  |
| C | 0.610501  | -0.364769 | 1.362643  |
| H | -0.536199 | 1.402760  | 1.695359  |
| H | 0.536196  | -1.402776 | 1.695347  |
| C | -1.759138 | 0.097548  | 0.585892  |
| C | -1.911204 | -1.097823 | -0.176497 |
| C | -2.796863 | 1.074680  | 0.542428  |
| C | -3.035475 | -1.287391 | -0.952133 |
| H | -1.132761 | -1.850908 | -0.159346 |
| C | -3.912875 | 0.875086  | -0.245199 |
| H | -2.696382 | 1.978961  | 1.131966  |
| C | -4.036744 | -0.304261 | -0.990834 |
| H | -3.146537 | -2.192275 | -1.536784 |
| H | -4.694110 | 1.624128  | -0.281872 |
| H | -4.914648 | -0.459127 | -1.607267 |
| C | 1.759137  | -0.097554 | 0.585895  |
| C | 2.796862  | -1.074685 | 0.542423  |
| C | 1.911204  | 1.097825  | -0.176484 |
| C | 3.912875  | -0.875084 | -0.245199 |
| H | 2.696380  | -1.978971 | 1.131953  |
| C | 3.035476  | 1.287400  | -0.952115 |
| H | 1.132761  | 1.850909  | -0.159327 |
| C | 4.036746  | 0.304270  | -0.990823 |
| H | 4.694111  | -1.624125 | -0.281877 |
| H | 3.146540  | 2.192289  | -1.536758 |
| H | 4.914651  | 0.459142  | -1.607253 |

13. (E)-form encounter complex (S0)

|   | X         | Y         | Z         |
|---|-----------|-----------|-----------|
| C | 2.002334  | -1.202321 | 0.334201  |
| C | 1.832846  | -0.057723 | -0.354675 |
| H | 2.733452  | -1.228806 | 1.138459  |
| H | 1.101401  | -0.032547 | -1.157542 |
| C | 1.296848  | -2.470049 | 0.121905  |
| C | 1.620848  | -3.568542 | 0.937101  |
| C | 0.303733  | -2.650990 | -0.859846 |
| C | 0.986442  | -4.797933 | 0.782252  |
| H | 2.383658  | -3.451929 | 1.700446  |
| C | -0.328618 | -3.878647 | -1.013586 |
| H | 0.019813  | -1.827781 | -1.504591 |
| C | 0.007579  | -4.959839 | -0.195564 |

|   |           |           |           |
|---|-----------|-----------|-----------|
| H | 1.257776  | -5.628554 | 1.424413  |
| H | -1.088813 | -3.995255 | -1.778347 |
| H | -0.488299 | -5.915581 | -0.321499 |
| C | 2.536470  | 1.211313  | -0.143911 |
| C | 3.518162  | 1.407120  | 0.845136  |
| C | 2.217344  | 2.300628  | -0.973523 |
| C | 4.147902  | 2.636361  | 0.993597  |
| H | 3.794814  | 0.592595  | 1.504272  |
| C | 2.848629  | 3.532606  | -0.825208 |
| H | 1.464248  | 2.170525  | -1.743847 |
| C | 3.817634  | 3.707526  | 0.160089  |
| H | 4.901984  | 2.762413  | 1.762825  |
| H | 2.583992  | 4.355172  | -1.480433 |
| H | 4.312120  | 4.664825  | 0.279163  |
| C | -2.306483 | 0.727582  | -0.975927 |
| O | -1.481446 | 0.433727  | -1.828235 |
| C | -2.020907 | 0.554139  | 0.470371  |
| C | -3.635066 | 1.272874  | -1.352485 |
| C | -2.929319 | 0.879680  | 1.400134  |
| C | -4.542487 | 1.597624  | -0.422158 |
| C | -4.258662 | 1.425102  | 1.026330  |
| O | -5.086172 | 1.720243  | 1.872386  |
| H | -1.044495 | 0.154726  | 0.721317  |
| H | -2.745030 | 0.763465  | 2.462402  |
| H | -5.519490 | 1.997505  | -0.670409 |
| H | -3.817558 | 1.388393  | -2.415238 |

14. (Z)-form encounter complex (S0)

|   | X         | Y         | Z         |
|---|-----------|-----------|-----------|
| C | 1.219606  | 0.748780  | -1.575284 |
| C | 1.489585  | -0.567955 | -1.664690 |
| H | 0.615453  | 1.161972  | -2.380165 |
| H | 1.143909  | -1.056993 | -2.573380 |
| C | 1.624029  | 1.746598  | -0.565389 |
| C | 2.904742  | 1.765103  | 0.009620  |
| C | 0.722439  | 2.766681  | -0.219171 |
| C | 3.261519  | 2.756016  | 0.918622  |
| H | 3.626847  | 1.007555  | -0.269682 |
| C | 1.077482  | 3.750706  | 0.700370  |
| H | -0.266214 | 2.775830  | -0.666423 |
| C | 2.347740  | 3.748976  | 1.274226  |
| H | 4.258830  | 2.758716  | 1.344720  |
| H | 0.363077  | 4.523567  | 0.961713  |
| H | 2.628599  | 4.520102  | 1.982794  |
| C | 2.167972  | -1.481004 | -0.725911 |
| C | 2.102987  | -1.338446 | 0.670343  |
| C | 2.855011  | -2.591923 | -1.243098 |
| C | 2.722813  | -2.257549 | 1.510652  |
| H | 1.558369  | -0.506564 | 1.098830  |
| C | 3.485142  | -3.505746 | -0.402929 |
| H | 2.898333  | -2.732889 | -2.318345 |
| C | 3.423579  | -3.341125 | 0.979527  |
| H | 2.654843  | -2.130626 | 2.585538  |
| H | 4.017878  | -4.349388 | -0.827575 |
| H | 3.906993  | -4.054507 | 1.637299  |
| C | -3.237717 | 0.901871  | -0.542997 |
| O | -2.718901 | 1.897264  | -1.024523 |
| C | -2.449516 | -0.326063 | -0.268880 |
| C | -4.684559 | 0.875987  | -0.209067 |
| C | -3.023097 | -1.415529 | 0.260459  |
| C | -5.257074 | -0.213726 | 0.319425  |
| C | -4.469547 | -1.443534 | 0.594453  |
| O | -4.992841 | -2.435205 | 1.074887  |
| H | -1.395581 | -0.285343 | -0.522925 |
| H | -2.468349 | -2.323529 | 0.469849  |
| H | -6.310747 | -0.258301 | 0.572202  |

H -5.237134 1.785222 -0.419051

15. (E)-form encounter complex (T1)

|   | X         | Y         | Z         |
|---|-----------|-----------|-----------|
| C | 1.439343  | 1.087948  | 0.521527  |
| C | 0.606691  | 1.597700  | -0.440096 |
| H | 1.162076  | 1.217877  | 1.563682  |
| H | 0.887555  | 1.486197  | -1.479207 |
| C | 2.691921  | 0.397481  | 0.311916  |
| C | 3.457031  | 0.039353  | 1.441967  |
| C | 3.190788  | 0.059103  | -0.964884 |
| C | 4.672858  | -0.616201 | 1.306574  |
| H | 3.082595  | 0.282437  | 2.430747  |
| C | 4.404303  | -0.597993 | -1.095808 |
| H | 2.615443  | 0.293505  | -1.850580 |
| C | 5.151979  | -0.936386 | 0.035798  |
| H | 5.245534  | -0.882048 | 2.187423  |
| H | 4.771193  | -0.856544 | -2.082383 |
| H | 6.099496  | -1.451232 | -0.074153 |
| C | -0.597642 | 2.380571  | -0.211540 |
| C | -1.039856 | 2.775479  | 1.067235  |
| C | -1.361147 | 2.772642  | -1.327661 |
| C | -2.198742 | 3.523521  | 1.216784  |
| H | -0.471756 | 2.506165  | 1.949567  |
| C | -2.523092 | 3.519022  | -1.175825 |
| H | -1.037650 | 2.472159  | -2.318258 |
| C | -2.947174 | 3.896752  | 0.097491  |
| H | -2.522737 | 3.820328  | 2.207657  |
| H | -3.099564 | 3.803879  | -2.048242 |
| H | -3.853211 | 4.478880  | 0.219725  |
| C | -0.828381 | -1.559270 | -0.586645 |
| O | 0.100410  | -0.791153 | -1.064739 |
| C | -1.623156 | -1.196330 | 0.544862  |
| C | -1.072339 | -2.827732 | -1.212682 |
| C | -2.589415 | -2.039922 | 1.021475  |
| C | -2.039020 | -3.666897 | -0.734261 |
| C | -2.861249 | -3.329414 | 0.414043  |
| O | -3.745968 | -4.099988 | 0.852049  |
| H | -1.439315 | -0.234751 | 1.007248  |
| H | -3.190668 | -1.766802 | 1.881874  |
| H | -2.222731 | -4.626536 | -1.205238 |
| H | -0.463995 | -3.090925 | -2.069963 |

16. (Z)-form encounter complex (T1)

|   | X         | Y         | Z         |
|---|-----------|-----------|-----------|
| C | 0.645267  | 0.573110  | -1.283402 |
| C | 0.860546  | -0.785109 | -1.318831 |
| H | -0.155344 | 0.928823  | -1.924173 |
| H | 0.276891  | -1.325970 | -2.059982 |
| C | 1.423316  | 1.640428  | -0.656460 |
| C | 2.811519  | 1.550061  | -0.448378 |
| C | 0.775511  | 2.848380  | -0.338862 |
| C | 3.518717  | 2.623530  | 0.079995  |
| H | 3.339284  | 0.646397  | -0.724405 |
| C | 1.481528  | 3.912904  | 0.206748  |
| H | -0.292217 | 2.933808  | -0.503700 |
| C | 2.856394  | 3.803977  | 0.418804  |
| H | 4.590335  | 2.542390  | 0.221948  |
| H | 0.962492  | 4.829603  | 0.461719  |
| H | 3.410247  | 4.637664  | 0.835196  |
| C | 1.710294  | -1.632476 | -0.501039 |
| C | 2.074268  | -1.308216 | 0.822217  |
| C | 2.119411  | -2.877010 | -1.022905 |
| C | 2.845591  | -2.183736 | 1.573426  |
| H | 1.712726  | -0.389551 | 1.263165  |

|   |           |           |           |
|---|-----------|-----------|-----------|
| C | 2.909166  | -3.739967 | -0.274735 |
| H | 1.818241  | -3.155075 | -2.027433 |
| C | 3.276784  | -3.394753 | 1.026449  |
| H | 3.103232  | -1.929568 | 2.595181  |
| H | 3.227004  | -4.685891 | -0.697642 |
| H | 3.880997  | -4.073200 | 1.617850  |
| C | -2.194460 | 0.032876  | 0.326940  |
| O | -0.918007 | 0.205604  | 0.500166  |
| C | -2.769274 | -0.394120 | -0.909568 |
| C | -3.075273 | 0.285479  | 1.432393  |
| C | -4.123215 | -0.549431 | -1.040619 |
| C | -4.426110 | 0.129057  | 1.300820  |
| C | -5.040219 | -0.295789 | 0.055130  |
| O | -6.278296 | -0.436082 | -0.066444 |
| H | -2.104332 | -0.599983 | -1.740115 |
| H | -4.558360 | -0.875946 | -1.978718 |
| H | -5.091085 | 0.321529  | 2.135727  |
| H | -2.628253 | 0.603617  | 2.366866  |

17. E-XP (T1)

|   | X         | Y         | Z         |
|---|-----------|-----------|-----------|
| C | -0.418112 | 0.556585  | 0.025993  |
| C | -1.818298 | 0.650093  | -0.492387 |
| H | -0.422717 | 0.134382  | 1.035373  |
| H | -2.027908 | 1.459055  | -1.183221 |
| C | 0.261844  | 1.913731  | 0.055578  |
| C | 0.230484  | 2.677562  | 1.225488  |
| C | 0.872312  | 2.439679  | -1.086166 |
| C | 0.799621  | 3.949147  | 1.256177  |
| H | -0.242709 | 2.278438  | 2.117546  |
| C | 1.445077  | 3.709458  | -1.054127 |
| H | 0.909354  | 1.849281  | -1.994293 |
| C | 1.409258  | 4.467893  | 0.115232  |
| H | 0.771143  | 4.530476  | 2.170827  |
| H | 1.922775  | 4.105651  | -1.943138 |
| H | 1.857496  | 5.454591  | 0.138323  |
| C | -2.868781 | -0.237586 | -0.163018 |
| C | -2.702034 | -1.371218 | 0.681230  |
| C | -4.170216 | -0.006903 | -0.694129 |
| C | -3.769525 | -2.203035 | 0.975964  |
| H | -1.726106 | -1.601147 | 1.091124  |
| C | -5.228800 | -0.845000 | -0.393278 |
| H | -4.322689 | 0.848306  | -1.343841 |
| C | -5.039164 | -1.949406 | 0.445753  |
| H | -3.616291 | -3.062427 | 1.619128  |
| H | -6.209500 | -0.644465 | -0.809968 |
| H | -5.868939 | -2.605743 | 0.680354  |
| C | 1.429044  | -0.988826 | -0.430024 |
| O | 0.291439  | -0.387681 | -0.841494 |
| C | 2.098913  | -0.716974 | 0.783869  |
| C | 1.943287  | -1.964140 | -1.323641 |
| C | 3.241999  | -1.412194 | 1.102819  |
| C | 3.079795  | -2.658110 | -1.016532 |
| C | 3.797223  | -2.423890 | 0.225184  |
| O | 4.836564  | -3.056054 | 0.520500  |
| H | 1.732814  | 0.048129  | 1.454833  |
| H | 3.774172  | -1.216683 | 2.026468  |
| H | 3.481549  | -3.409286 | -1.686453 |
| H | 1.399968  | -2.139872 | -2.245007 |

18. Z-XP (T1)

|   | X         | Y         | Z         |
|---|-----------|-----------|-----------|
| C | -0.582796 | -0.704667 | -0.814156 |
| C | -0.647615 | 0.715374  | -1.293433 |
| H | -0.191047 | -1.318269 | -1.632869 |

|   |           |           |           |
|---|-----------|-----------|-----------|
| H | -0.642166 | 0.839421  | -2.371941 |
| C | -1.901846 | -1.339386 | -0.379404 |
| C | -3.101465 | -0.628611 | -0.339505 |
| C | -1.906591 | -2.699603 | -0.045213 |
| C | -4.286644 | -1.263912 | 0.035205  |
| H | -3.115279 | 0.422117  | -0.600338 |
| C | -3.085955 | -3.331953 | 0.332458  |
| H | -0.978990 | -3.261021 | -0.073360 |
| C | -4.282209 | -2.613713 | 0.373168  |
| H | -5.211562 | -0.698961 | 0.063162  |
| H | -3.074272 | -4.384631 | 0.591787  |
| H | -5.203086 | -3.106253 | 0.664273  |
| C | -0.735414 | 1.890385  | -0.510986 |
| C | -0.803553 | 1.893762  | 0.912143  |
| C | -0.765026 | 3.155159  | -1.168530 |
| C | -0.896714 | 3.084253  | 1.614013  |
| H | -0.780006 | 0.954513  | 1.447387  |
| C | -0.855956 | 4.336049  | -0.454410 |
| H | -0.712804 | 3.181159  | -2.251959 |
| C | -0.922339 | 4.312006  | 0.943714  |
| H | -0.948051 | 3.061609  | 2.696952  |
| H | -0.874814 | 5.283603  | -0.981131 |
| H | -0.991726 | 5.237798  | 1.502764  |
| C | 1.665676  | -0.837384 | 0.141396  |
| O | 0.328120  | -0.881450 | 0.317826  |
| C | 2.316550  | -0.586662 | -1.087173 |
| C | 2.428569  | -1.078654 | 1.313323  |
| C | 3.690557  | -0.586319 | -1.145001 |
| C | 3.794419  | -1.079662 | 1.266556  |
| C | 4.509448  | -0.833978 | 0.025788  |
| O | 5.759797  | -0.833833 | -0.031102 |
| H | 1.743097  | -0.380878 | -1.980827 |
| H | 4.209975  | -0.393260 | -2.076369 |
| H | 4.389786  | -1.264754 | 2.152934  |
| H | 1.891043  | -1.264831 | 2.236018  |

19. tw-XP (T1)

|   | X         | Y         | Z         |
|---|-----------|-----------|-----------|
| C | -0.511130 | -0.589461 | -0.153623 |
| C | -0.696693 | 0.563632  | 0.783461  |
| H | -0.314640 | -0.254247 | -1.174791 |
| H | -0.656662 | 0.306456  | 1.837592  |
| C | -1.733583 | -1.491218 | -0.165669 |
| C | -2.622068 | -1.443076 | -1.242018 |
| C | -2.012181 | -2.339522 | 0.911802  |
| C | -3.774965 | -2.226609 | -1.243585 |
| H | -2.413832 | -0.794631 | -2.086766 |
| C | -3.159621 | -3.126789 | 0.906426  |
| H | -1.321003 | -2.395804 | 1.744283  |
| C | -4.046738 | -3.069874 | -0.168991 |
| H | -4.454689 | -2.182618 | -2.086996 |
| H | -3.361966 | -3.787228 | 1.742157  |
| H | -4.940686 | -3.683037 | -0.170371 |
| C | -0.986912 | 1.901588  | 0.435916  |
| C | -1.105908 | 2.367639  | -0.905100 |
| C | -1.169020 | 2.863024  | 1.472983  |
| C | -1.378420 | 3.698420  | -1.177609 |
| H | -0.988844 | 1.678431  | -1.732710 |
| C | -1.441980 | 4.188178  | 1.188110  |
| H | -1.086650 | 2.536652  | 2.504096  |
| C | -1.548526 | 4.620191  | -0.139551 |
| H | -1.462858 | 4.025952  | -2.207897 |
| H | -1.573356 | 4.895859  | 1.998992  |
| H | -1.762143 | 5.659030  | -0.361396 |
| C | 1.881781  | -1.016748 | 0.093266  |
| O | 0.605625  | -1.418363 | 0.277149  |

|   |          |           |           |
|---|----------|-----------|-----------|
| C | 2.271061 | 0.210214  | -0.488182 |
| C | 2.864758 | -1.944750 | 0.523929  |
| C | 3.607184 | 0.498679  | -0.640818 |
| C | 4.194778 | -1.666745 | 0.376946  |
| C | 4.646024 | -0.421040 | -0.219758 |
| O | 5.860902 | -0.154838 | -0.361259 |
| H | 1.529857 | 0.932380  | -0.801742 |
| H | 3.928109 | 1.435697  | -1.080698 |
| H | 4.957049 | -2.366955 | 0.697902  |
| H | 2.523056 | -2.874719 | 0.963614  |

20. TS1 (T1)

|   | X         | Y         | Z         |
|---|-----------|-----------|-----------|
| C | -0.897541 | -0.920130 | 0.340158  |
| C | -0.194752 | -1.879468 | -0.387344 |
| H | -0.425134 | -0.502586 | 1.222179  |
| H | -0.678231 | -2.298342 | -1.263361 |
| C | -2.343403 | -0.732015 | 0.279760  |
| C | -2.976734 | -0.062132 | 1.340946  |
| C | -3.131988 | -1.187074 | -0.792123 |
| C | -4.352418 | 0.134067  | 1.341551  |
| H | -2.379099 | 0.307453  | 2.167302  |
| C | -4.505426 | -0.984924 | -0.792731 |
| H | -2.670741 | -1.682041 | -1.637459 |
| C | -5.121742 | -0.328076 | 0.274365  |
| H | -4.823877 | 0.650807  | 2.169375  |
| H | -5.099695 | -1.335005 | -1.628913 |
| H | -6.194616 | -0.173475 | 0.269912  |
| C | 1.136045  | -2.357705 | -0.127900 |
| C | 1.838350  | -2.100077 | 1.072685  |
| C | 1.772962  | -3.152131 | -1.109053 |
| C | 3.118112  | -2.595374 | 1.265508  |
| H | 1.368781  | -1.529328 | 1.864541  |
| C | 3.056087  | -3.640899 | -0.913855 |
| H | 1.247275  | -3.366790 | -2.033123 |
| C | 3.736148  | -3.362692 | 0.273264  |
| H | 3.639559  | -2.390703 | 2.193379  |
| H | 3.529710  | -4.238436 | -1.683996 |
| H | 4.738189  | -3.745042 | 0.429083  |
| C | 0.293970  | 1.712033  | -0.582467 |
| O | -0.481095 | 0.719142  | -0.927915 |
| C | 1.410686  | 1.584245  | 0.295970  |
| C | 0.007685  | 3.006636  | -1.129853 |
| C | 2.181828  | 2.669410  | 0.619690  |
| C | 0.776305  | 4.090458  | -0.812098 |
| C | 1.910983  | 3.993549  | 0.090404  |
| O | 2.612237  | 4.986198  | 0.391226  |
| H | 1.656153  | 0.603338  | 0.683197  |
| H | 3.035654  | 2.571930  | 1.281260  |
| H | 0.556446  | 5.070554  | -1.221232 |
| H | -0.840454 | 3.088747  | -1.799894 |

21. TS2 (T1)

|   | X         | Y         | Z         |
|---|-----------|-----------|-----------|
| C | 0.536599  | 0.544662  | -1.187997 |
| C | 0.835852  | -0.807241 | -1.291890 |
| H | -0.255490 | 0.889343  | -1.843965 |
| H | 0.289249  | -1.345944 | -2.061863 |
| C | 1.341116  | 1.628165  | -0.609005 |
| C | 2.740386  | 1.551588  | -0.508440 |
| C | 0.706787  | 2.830178  | -0.249131 |
| C | 3.476759  | 2.635431  | -0.041852 |
| H | 3.254951  | 0.651378  | -0.818566 |
| C | 1.443066  | 3.905543  | 0.231278  |
| H | -0.371203 | 2.901960  | -0.326781 |



|   |           |           |           |
|---|-----------|-----------|-----------|
| C | 2.831403  | 3.811585  | 0.337907  |
| H | 4.556702  | 2.563840  | 0.018754  |
| H | 0.935985  | 4.819242  | 0.519076  |
| H | 3.407024  | 4.653604  | 0.705161  |
| C | 1.699157  | -1.635826 | -0.481861 |
| C | 2.077202  | -1.299266 | 0.837041  |
| C | 2.118089  | -2.880934 | -1.001178 |
| C | 2.867639  | -2.161085 | 1.582578  |
| H | 1.711203  | -0.382045 | 1.277444  |
| C | 2.925186  | -3.729695 | -0.257254 |
| H | 1.808795  | -3.167806 | -2.000697 |
| C | 3.305165  | -3.371388 | 1.037527  |
| H | 3.136083  | -1.897744 | 2.599160  |
| H | 3.248621  | -4.674855 | -0.677541 |
| H | 3.924346  | -4.039129 | 1.625571  |
| C | -2.153402 | 0.091517  | 0.300392  |
| O | -0.881563 | 0.323843  | 0.475837  |
| C | -2.714696 | -0.411960 | -0.911650 |
| C | -3.041764 | 0.359459  | 1.395149  |
| C | -4.062938 | -0.623290 | -1.031886 |
| C | -4.386271 | 0.147160  | 1.278355  |
| C | -4.986383 | -0.355421 | 0.054802  |
| O | -6.218688 | -0.547606 | -0.056150 |
| H | -2.049408 | -0.635429 | -1.737420 |
| H | -4.487682 | -1.008063 | -1.952467 |
| H | -5.056251 | 0.350944  | 2.106503  |
| H | -2.604624 | 0.735703  | 2.312830  |

22. TS3 (T1)

|   | X         | Y         | Z         |
|---|-----------|-----------|-----------|
| C | -0.016353 | 0.404026  | 0.522063  |
| C | -0.496804 | -1.019548 | 0.477028  |
| H | 0.442993  | 0.574574  | 1.501865  |
| H | 0.292775  | -1.725408 | 0.719547  |
| C | -0.999997 | 1.534304  | 0.299319  |
| C | -1.671945 | 2.072349  | 1.399894  |
| C | -1.245131 | 2.059035  | -0.972375 |
| C | -2.594837 | 3.102842  | 1.232675  |
| H | -1.477988 | 1.681542  | 2.393825  |
| C | -2.162205 | 3.094656  | -1.138518 |
| H | -0.716271 | 1.658084  | -1.827394 |
| C | -2.843462 | 3.616011  | -0.039040 |
| H | -3.110462 | 3.509525  | 2.095195  |
| H | -2.344005 | 3.495939  | -2.129215 |
| H | -3.555482 | 4.422685  | -0.171319 |
| C | -1.742638 | -1.612238 | 0.156975  |
| C | -2.943336 | -0.925855 | -0.187908 |
| C | -1.807716 | -3.039899 | 0.187230  |
| C | -4.103521 | -1.623901 | -0.482225 |
| H | -2.959250 | 0.152049  | -0.222047 |
| C | -2.971914 | -3.723161 | -0.108862 |
| H | -0.911630 | -3.593685 | 0.446551  |
| C | -4.134561 | -3.021352 | -0.448002 |
| H | -5.000558 | -1.072364 | -0.741518 |
| H | -2.981302 | -4.806998 | -0.078751 |
| H | -5.048719 | -3.555008 | -0.680254 |
| C | 2.318125  | 0.204092  | -0.235635 |
| O | 1.044187  | 0.570062  | -0.481216 |
| C | 2.789330  | -0.370336 | 0.966852  |
| C | 3.221329  | 0.447032  | -1.303809 |
| C | 4.121149  | -0.686616 | 1.099716  |
| C | 4.545867  | 0.134469  | -1.182601 |
| C | 5.077173  | -0.453880 | 0.034883  |
| O | 6.288010  | -0.744972 | 0.159499  |
| H | 2.113332  | -0.570500 | 1.787857  |
| H | 4.500733  | -1.127855 | 2.013914  |

|   |          |          |           |
|---|----------|----------|-----------|
| H | 5.244593 | 0.315915 | -1.990838 |
| H | 2.822335 | 0.888602 | -2.209653 |

23. TS4 (T1)

|   | X         | Y         | Z         |
|---|-----------|-----------|-----------|
| C | -0.342600 | 0.469498  | -0.108798 |
| C | -1.389882 | -0.259195 | -0.886595 |
| H | -0.193959 | 0.011840  | 0.865051  |
| H | -1.534289 | 0.091635  | -1.903624 |
| C | -0.701559 | 1.931860  | 0.095332  |
| C | -1.181326 | 2.361471  | 1.334977  |
| C | -0.599665 | 2.853121  | -0.953079 |
| C | -1.557724 | 3.689763  | 1.527114  |
| H | -1.261277 | 1.657276  | 2.157061  |
| C | -0.970933 | 4.180354  | -0.759247 |
| H | -0.212442 | 2.533555  | -1.913282 |
| C | -1.453777 | 4.602282  | 0.479944  |
| H | -1.924452 | 4.011009  | 2.495416  |
| H | -0.881303 | 4.888119  | -1.575723 |
| H | -1.742071 | 5.636646  | 0.628309  |
| C | -2.207825 | -1.314421 | -0.426853 |
| C | -2.141070 | -1.865367 | 0.885424  |
| C | -3.169583 | -1.880050 | -1.315536 |
| C | -2.969984 | -2.906781 | 1.267455  |
| H | -1.434206 | -1.471310 | 1.605421  |
| C | -3.991859 | -2.919787 | -0.922507 |
| H | -3.245949 | -1.479218 | -2.320507 |
| C | -3.900950 | -3.444629 | 0.372366  |
| H | -2.894945 | -3.307994 | 2.272070  |
| H | -4.710891 | -3.330211 | -1.622675 |
| H | -4.545678 | -4.259634 | 0.679147  |
| C | 2.036622  | -0.146854 | -0.420642 |
| O | 0.897513  | 0.408291  | -0.883093 |
| C | 2.198823  | -0.789157 | 0.827156  |
| C | 3.137473  | -0.053191 | -1.312687 |
| C | 3.420649  | -1.315612 | 1.173998  |
| C | 4.355512  | -0.574154 | -0.978448 |
| C | 4.570582  | -1.240013 | 0.294504  |
| O | 5.680510  | -1.721203 | 0.615121  |
| H | 1.373662  | -0.878746 | 1.520532  |
| H | 3.562359  | -1.812246 | 2.126772  |
| H | 5.201730  | -0.507235 | -1.652150 |
| H | 2.973981  | 0.444985  | -2.261299 |

24. TS5 (T1)

|   | X         | Y         | Z         |
|---|-----------|-----------|-----------|
| C | -0.691727 | -0.548207 | -0.539345 |
| C | -1.698330 | 0.557836  | -0.663173 |
| H | -0.162283 | -0.661215 | -1.492083 |
| H | -2.582434 | 0.240209  | -1.208086 |
| C | -1.346749 | -1.887764 | -0.231617 |
| C | -2.184539 | -2.029854 | 0.879522  |
| C | -1.100305 | -2.993930 | -1.046078 |
| C | -2.762783 | -3.261679 | 1.169624  |
| H | -2.378745 | -1.174024 | 1.516513  |
| C | -1.685095 | -4.228002 | -0.760389 |
| H | -0.449137 | -2.894194 | -1.908751 |
| C | -2.515559 | -4.363466 | 0.348757  |
| H | -3.408529 | -3.363831 | 2.034549  |
| H | -1.488822 | -5.079625 | -1.401844 |
| H | -2.969437 | -5.321798 | 0.574451  |
| C | -1.660420 | 1.921371  | -0.289080 |
| C | -0.604999 | 2.564177  | 0.422432  |
| C | -2.779194 | 2.734294  | -0.650170 |
| C | -0.673597 | 3.912975  | 0.732177  |

|   |           |           |           |
|---|-----------|-----------|-----------|
| H | 0.255862  | 1.995872  | 0.737082  |
| C | -2.833982 | 4.078315  | -0.332824 |
| H | -3.601040 | 2.275040  | -1.189367 |
| C | -1.779829 | 4.683891  | 0.361538  |
| H | 0.145789  | 4.373586  | 1.273082  |
| H | -3.698363 | 4.664324  | -0.625017 |
| H | -1.821454 | 5.737661  | 0.610782  |
| C | 1.617209  | -0.228959 | 0.225344  |
| O | 0.296503  | -0.304709 | 0.502424  |
| C | 2.156372  | 0.148838  | -1.025926 |
| C | 2.479002  | -0.495212 | 1.318980  |
| C | 3.518467  | 0.230942  | -1.187135 |
| C | 3.836331  | -0.415103 | 1.170187  |
| C | 4.438200  | -0.052763 | -0.101337 |
| O | 5.678271  | 0.018334  | -0.252517 |
| H | 1.504036  | 0.404537  | -1.851398 |
| H | 3.952290  | 0.529628  | -2.134250 |
| H | 4.508343  | -0.627543 | 1.993360  |
| H | 2.024894  | -0.773834 | 2.262801  |

25. CP1 (S0) (identical to 26. CP1 (T1))

|   | X         | Y         | Z         |
|---|-----------|-----------|-----------|
| C | 0.615657  | 1.036224  | -0.440596 |
| C | 1.595543  | 0.652998  | 0.567950  |
| H | 1.044961  | 1.272641  | -1.398329 |
| H | 1.271901  | 0.674796  | 1.595977  |
| C | -0.522103 | 1.887056  | -0.061031 |
| C | -1.071303 | 2.754885  | -1.023298 |
| C | -1.138789 | 1.824487  | 1.201939  |
| C | -2.189303 | 3.531013  | -0.735268 |
| H | -0.611044 | 2.814323  | -2.005503 |
| C | -2.260250 | 2.603030  | 1.491279  |
| H | -0.751538 | 1.155929  | 1.963899  |
| C | -2.790726 | 3.457850  | 0.525962  |
| H | -2.594235 | 4.195137  | -1.492878 |
| H | -2.722664 | 2.534707  | 2.471392  |
| H | -3.664411 | 4.063213  | 0.752061  |
| C | 2.886358  | 0.153016  | 0.291225  |
| C | 3.391793  | -0.089384 | -1.017126 |
| C | 3.756017  | -0.132775 | 1.381193  |
| C | 4.678396  | -0.565529 | -1.211618 |
| H | 2.747927  | 0.081651  | -1.870935 |
| C | 5.041613  | -0.606286 | 1.179230  |
| H | 3.390426  | 0.038219  | 2.388811  |
| C | 5.517179  | -0.825022 | -0.120100 |
| H | 5.036882  | -0.744075 | -2.221027 |
| H | 5.681761  | -0.809285 | 2.032329  |
| H | 6.524095  | -1.197285 | -0.280490 |
| C | -1.067195 | -1.156373 | -0.645685 |
| O | 0.019172  | -0.446603 | -1.063857 |
| C | -2.387571 | -0.696343 | -0.921056 |
| C | -0.846869 | -2.382500 | 0.051519  |
| C | -3.467525 | -1.461017 | -0.539262 |
| C | -1.914845 | -3.157508 | 0.434878  |
| C | -3.283042 | -2.727144 | 0.162875  |
| O | -4.267527 | -3.424552 | 0.518877  |
| H | -2.533580 | 0.234660  | -1.460896 |
| H | -4.485486 | -1.155537 | -0.758643 |
| H | -1.782299 | -4.102843 | 0.952087  |
| H | 0.175938  | -2.691090 | 0.253940  |

27. CP2 (S0) (identical to 28. CP2 (T1))

|   | X        | Y        | Z        |
|---|----------|----------|----------|
| C | 1.346802 | 0.626718 | 1.522006 |
| C | 0.509876 | 1.839545 | 1.364843 |

|   |           |           |           |
|---|-----------|-----------|-----------|
| H | 1.835484  | 0.669059  | 2.494440  |
| H | 0.414775  | 2.434930  | 2.262634  |
| C | 2.355620  | 0.201570  | 0.486052  |
| C | 3.022111  | -1.021560 | 0.681338  |
| C | 2.741266  | 1.013921  | -0.583597 |
| C | 4.023905  | -1.431639 | -0.194686 |
| H | 2.741159  | -1.652037 | 1.519718  |
| C | 3.748201  | 0.603471  | -1.462297 |
| H | 2.261513  | 1.977340  | -0.722522 |
| C | 4.388147  | -0.620280 | -1.274337 |
| H | 4.526441  | -2.381693 | -0.032904 |
| H | 4.032247  | 1.247459  | -2.289700 |
| H | 5.172202  | -0.938550 | -1.956264 |
| C | -0.452964 | 2.042480  | 0.363459  |
| C | -0.585536 | 1.233471  | -0.805153 |
| C | -1.434421 | 3.060735  | 0.562795  |
| C | -1.649330 | 1.400990  | -1.675968 |
| H | 0.173073  | 0.496071  | -1.033927 |
| C | -2.482932 | 3.231415  | -0.323397 |
| H | -1.356694 | 3.692839  | 1.442951  |
| C | -2.608585 | 2.394120  | -1.442882 |
| H | -1.738164 | 0.758853  | -2.547534 |
| H | -3.219858 | 4.008814  | -0.143071 |
| H | -3.438718 | 2.521963  | -2.130631 |
| C | -0.601299 | -1.093706 | 1.039091  |
| O | 0.332642  | -0.521064 | 1.873809  |
| C | -1.964405 | -0.935722 | 1.400412  |
| C | -0.227120 | -1.932444 | -0.041618 |
| C | -2.946531 | -1.613471 | 0.712917  |
| C | -1.197969 | -2.620055 | -0.735463 |
| C | -2.612238 | -2.490083 | -0.402325 |
| O | -3.497131 | -3.105970 | -1.046766 |
| H | -2.211106 | -0.282574 | 2.232632  |
| H | -3.994572 | -1.515116 | 0.977843  |
| H | -0.937971 | -3.296445 | -1.543757 |
| H | 0.820519  | -2.061495 | -0.293386 |

29. E-OX (S0)

|   | X         | Y         | Z         |
|---|-----------|-----------|-----------|
| C | 1.115138  | -0.235486 | -0.845056 |
| C | 0.035932  | 0.166731  | 0.194969  |
| H | 1.071980  | 0.373622  | -1.754288 |
| H | 0.404742  | -0.050746 | 1.198445  |
| C | 2.542105  | -0.341817 | -0.380301 |
| C | 3.061082  | -1.545437 | 0.103148  |
| C | 3.360862  | 0.793356  | -0.404042 |
| C | 4.375737  | -1.609686 | 0.563526  |
| H | 2.436761  | -2.430337 | 0.096035  |
| C | 4.669507  | 0.730717  | 0.066979  |
| H | 2.973056  | 1.730327  | -0.791733 |
| C | 5.180954  | -0.472706 | 0.552937  |
| H | 4.771737  | -2.551338 | 0.927490  |
| H | 5.292581  | 1.617875  | 0.047143  |
| H | 6.202441  | -0.524320 | 0.912415  |
| C | -0.617093 | 1.520516  | 0.197939  |
| C | -0.755110 | 2.304271  | -0.954815 |
| C | -1.127053 | 2.022121  | 1.402881  |
| C | -1.384859 | 3.546257  | -0.903855 |
| H | -0.366684 | 1.955003  | -1.904507 |
| C | -1.763180 | 3.259643  | 1.456131  |
| H | -1.022970 | 1.434336  | 2.309115  |
| C | -1.893865 | 4.027383  | 0.300660  |
| H | -1.476955 | 4.138436  | -1.807453 |
| H | -2.151061 | 3.625529  | 2.400081  |
| H | -2.384241 | 4.993350  | 0.338761  |
| C | -0.734802 | -1.127311 | -0.330007 |

|   |           |           |           |
|---|-----------|-----------|-----------|
| O | 0.463767  | -1.511850 | -1.075652 |
| C | -1.881756 | -0.857005 | -1.251156 |
| C | -1.057174 | -2.103715 | 0.754327  |
| C | -3.123126 | -1.297127 | -1.019870 |
| C | -2.297859 | -2.535694 | 1.005267  |
| C | -3.443750 | -2.131193 | 0.159223  |
| O | -4.585583 | -2.490067 | 0.407102  |
| H | -1.662428 | -0.266497 | -2.134239 |
| H | -3.947203 | -1.076479 | -1.689053 |
| H | -2.520259 | -3.211445 | 1.823603  |
| H | -0.217118 | -2.424876 | 1.363278  |

30. E-OX (T1)

|   | X         | Y         | Z         |
|---|-----------|-----------|-----------|
| C | 1.077469  | -0.212517 | -0.837306 |
| C | 0.047888  | 0.250963  | 0.221973  |
| H | 1.067471  | 0.409886  | -1.739098 |
| H | 0.425674  | 0.033980  | 1.222683  |
| C | 2.502434  | -0.414257 | -0.392183 |
| C | 2.947972  | -1.651813 | 0.079028  |
| C | 3.397018  | 0.662131  | -0.425003 |
| C | 4.262161  | -1.807051 | 0.518907  |
| H | 2.264002  | -2.491526 | 0.077022  |
| C | 4.706227  | 0.509202  | 0.023710  |
| H | 3.067196  | 1.624866  | -0.803381 |
| C | 5.143180  | -0.727725 | 0.498335  |
| H | 4.598852  | -2.775098 | 0.873701  |
| H | 5.387741  | 1.352270  | -0.004284 |
| H | 6.164662  | -0.849898 | 0.840638  |
| C | -0.536848 | 1.635412  | 0.212180  |
| C | -0.689359 | 2.391108  | -0.957818 |
| C | -0.975825 | 2.196765  | 1.419239  |
| C | -1.262973 | 3.660866  | -0.921846 |
| H | -0.354052 | 1.996621  | -1.910147 |
| C | -1.554764 | 3.462484  | 1.458735  |
| H | -0.858959 | 1.632784  | 2.339000  |
| C | -1.700526 | 4.200834  | 0.285660  |
| H | -1.366099 | 4.229048  | -1.839729 |
| H | -1.885616 | 3.874166  | 2.405747  |
| H | -2.145478 | 5.189022  | 0.312855  |
| C | -0.821275 | -1.003790 | -0.251054 |
| O | 0.347466  | -1.440298 | -1.071743 |
| C | -1.995259 | -0.725163 | -1.118477 |
| C | -1.130295 | -1.989397 | 0.815631  |
| C | -3.214740 | -1.302434 | -0.951018 |
| C | -2.351883 | -2.563653 | 0.991721  |
| C | -3.431451 | -2.228141 | 0.118239  |
| O | -4.615204 | -2.761127 | 0.297114  |
| H | -1.853862 | -0.042892 | -1.948110 |
| H | -4.039648 | -1.082358 | -1.616580 |
| H | -2.530971 | -3.280563 | 1.782949  |
| H | -0.313908 | -2.271844 | 1.471828  |

31. Z-OX (S0)

|   | X         | Y         | Z         |
|---|-----------|-----------|-----------|
| C | 0.655871  | -1.244057 | -1.015272 |
| C | -0.311333 | -0.009824 | -1.049059 |
| H | 0.739762  | -1.675185 | -2.020845 |
| H | -0.677973 | 0.147399  | -2.063548 |
| C | 2.037512  | -1.178342 | -0.418571 |
| C | 2.341461  | -1.832190 | 0.777122  |
| C | 3.048964  | -0.486203 | -1.094251 |
| C | 3.636010  | -1.783306 | 1.295689  |
| H | 1.562366  | -2.382133 | 1.290189  |
| C | 4.337577  | -0.431035 | -0.571959 |

|   |           |           |           |
|---|-----------|-----------|-----------|
| H | 2.827100  | 0.018068  | -2.029680 |
| C | 4.635104  | -1.079865 | 0.627290  |
| H | 3.862496  | -2.299444 | 2.222175  |
| H | 5.110429  | 0.115616  | -1.100631 |
| H | 5.639910  | -1.040949 | 1.032499  |
| C | 0.032784  | 1.339251  | -0.476800 |
| C | 0.756608  | 1.522625  | 0.710042  |
| C | -0.414750 | 2.479968  | -1.157469 |
| C | 1.016315  | 2.801549  | 1.196313  |
| H | 1.137074  | 0.668429  | 1.254220  |
| C | -0.159961 | 3.760258  | -0.671151 |
| H | -0.973870 | 2.362942  | -2.080336 |
| C | 0.558065  | 3.925192  | 0.510555  |
| H | 1.582731  | 2.919103  | 2.113382  |
| H | -0.520812 | 4.625164  | -1.216288 |
| H | 0.761426  | 4.919028  | 0.892909  |
| C | -1.315571 | -0.982989 | -0.277260 |
| O | -0.283662 | -2.016421 | -0.230772 |
| C | -2.457546 | -1.398929 | -1.153797 |
| C | -1.741503 | -0.567790 | 1.093884  |
| C | -3.741275 | -1.226048 | -0.822464 |
| C | -3.022573 | -0.399471 | 1.439024  |
| C | -4.127988 | -0.665760 | 0.491394  |
| O | -5.296081 | -0.462202 | 0.787974  |
| H | -2.181211 | -1.838098 | -2.108569 |
| H | -4.552939 | -1.502927 | -1.485953 |
| H | -3.312474 | -0.074765 | 2.432148  |
| H | -0.948692 | -0.391467 | 1.811145  |

32. Z-OX (T1)

|   | X         | Y         | Z         |
|---|-----------|-----------|-----------|
| C | 0.639924  | -1.126116 | -1.213918 |
| C | -0.266243 | 0.146283  | -1.141989 |
| H | 0.804208  | -1.417466 | -2.258651 |
| H | -0.622500 | 0.383608  | -2.145291 |
| C | 1.964404  | -1.210785 | -0.496264 |
| C | 2.118736  | -1.991322 | 0.651379  |
| C | 3.075263  | -0.530597 | -1.009177 |
| C | 3.359724  | -2.078471 | 1.283806  |
| H | 1.263821  | -2.535199 | 1.033443  |
| C | 4.311263  | -0.612415 | -0.374937 |
| H | 2.971707  | 0.070988  | -1.906980 |
| C | 4.457464  | -1.387016 | 0.776779  |
| H | 3.467907  | -2.692565 | 2.171271  |
| H | 5.161599  | -0.074893 | -0.779841 |
| H | 5.421281  | -1.455173 | 1.268691  |
| C | 0.127994  | 1.440989  | -0.486119 |
| C | 0.826225  | 1.522525  | 0.727772  |
| C | -0.249953 | 2.641295  | -1.105355 |
| C | 1.127141  | 2.757594  | 1.297851  |
| H | 1.157733  | 0.622321  | 1.227817  |
| C | 0.047047  | 3.877630  | -0.536820 |
| H | -0.787944 | 2.604329  | -2.047356 |
| C | 0.738176  | 3.939823  | 0.671077  |
| H | 1.672840  | 2.794293  | 2.234241  |
| H | -0.259191 | 4.788998  | -1.038273 |
| H | 0.974769  | 4.899003  | 1.117730  |
| C | -1.346829 | -0.817916 | -0.461848 |
| O | -0.392471 | -1.949917 | -0.628254 |
| C | -2.567805 | -1.028909 | -1.284115 |
| C | -1.669056 | -0.599550 | 0.972043  |
| C | -3.836321 | -0.980687 | -0.795206 |
| C | -2.935476 | -0.556892 | 1.466621  |
| C | -4.055882 | -0.726967 | 0.594439  |
| O | -5.275925 | -0.646221 | 1.065007  |
| H | -2.414509 | -1.256861 | -2.333983 |

|   |           |           |           |
|---|-----------|-----------|-----------|
| H | -4.695864 | -1.140140 | -1.433733 |
| H | -3.123618 | -0.400704 | 2.521206  |
| H | -0.839856 | -0.492414 | 1.659577  |

33. Diacetyl (S0 state)

|   | X         | Y         | Z         |
|---|-----------|-----------|-----------|
| C | -0.697608 | 0.344984  | -0.000026 |
| O | -0.759194 | 1.553672  | -0.000020 |
| C | -1.897087 | -0.563248 | 0.000004  |
| C | 0.697605  | -0.344972 | -0.000005 |
| H | -2.807594 | 0.033645  | -0.000307 |
| O | 0.759178  | -1.553660 | -0.000020 |
| C | 1.897093  | 0.563236  | 0.000030  |
| H | 1.870745  | 1.219635  | -0.874207 |
| H | 1.870547  | 1.219904  | 0.874052  |
| H | 2.807594  | -0.033678 | 0.000199  |
| H | -1.870439 | -1.220150 | -0.873832 |
| H | -1.870748 | -1.219451 | 0.874400  |

34. Diacetyl (T1 state)

|   | X         | Y         | Z         |
|---|-----------|-----------|-----------|
| C | -0.668244 | -0.315972 | -0.000047 |
| O | -0.796645 | -1.551230 | -0.000060 |
| C | -1.877405 | 0.593315  | 0.000074  |
| C | 0.668304  | 0.316014  | -0.000081 |
| H | -2.487605 | 0.395711  | 0.885147  |
| O | 0.796652  | 1.551243  | -0.000049 |
| C | 1.877368  | -0.593353 | 0.000053  |
| H | 2.486913  | -0.396571 | 0.885774  |
| H | 1.534998  | -1.629668 | -0.001268 |
| H | 2.488674  | -0.394622 | -0.883977 |
| H | -1.535134 | 1.629672  | -0.000189 |
| H | -2.488045 | 0.395363  | -0.884607 |

35. Diacetyl (anion doublet state)

|   | X         | Y         | Z         |
|---|-----------|-----------|-----------|
| C | -0.655470 | -0.299545 | -0.000143 |
| O | -0.864215 | -1.554872 | -0.000098 |
| C | -1.856500 | 0.640061  | 0.000026  |
| C | 0.655470  | 0.299545  | -0.000138 |
| H | -2.480103 | 0.442425  | 0.881761  |
| O | 0.864215  | 1.554872  | 0.000168  |
| C | 1.856500  | -0.640061 | 0.000049  |
| H | 2.479582  | -0.443133 | 0.882319  |
| H | 1.544793  | -1.685873 | -0.001092 |
| H | 2.481042  | -0.441451 | -0.880789 |
| H | -1.544792 | 1.685873  | -0.000179 |
| H | -2.480523 | 0.442160  | -0.881347 |

36. (E)-form encounter complex with diacetyl (T1)

|   | X        | Y         | Z         |
|---|----------|-----------|-----------|
| C | 1.451590 | -0.240033 | -0.272838 |
| C | 1.626736 | -1.535045 | 0.057743  |
| H | 0.489123 | 0.076899  | -0.663535 |
| H | 2.596413 | -1.855926 | 0.429975  |
| C | 2.441761 | 0.834288  | -0.169822 |
| C | 2.089314 | 2.116357  | -0.628683 |
| C | 3.732509 | 0.661325  | 0.364823  |
| C | 2.986422 | 3.178502  | -0.565767 |
| H | 1.096967 | 2.271072  | -1.039107 |
| C | 4.627544 | 1.721463  | 0.427884  |
| H | 4.040188 | -0.308942 | 0.736570  |
| C | 4.261343 | 2.986786  | -0.037321 |

|   |           |           |           |
|---|-----------|-----------|-----------|
| H | 2.689687  | 4.156267  | -0.928944 |
| H | 5.616872  | 1.563600  | 0.843170  |
| H | 4.962888  | 3.811582  | 0.014565  |
| C | 0.634964  | -2.607813 | -0.037675 |
| C | -0.694044 | -2.401333 | -0.456129 |
| C | 1.019270  | -3.916308 | 0.305646  |
| C | -1.587818 | -3.461754 | -0.531166 |
| H | -1.032199 | -1.406249 | -0.719752 |
| C | 0.122073  | -4.977681 | 0.231658  |
| H | 2.038383  | -4.097794 | 0.631935  |
| C | -1.187584 | -4.755889 | -0.188346 |
| H | -2.606106 | -3.280127 | -0.857385 |
| H | 0.445866  | -5.976772 | 0.501470  |
| H | -1.890619 | -5.578949 | -0.247560 |
| C | -2.565840 | 1.513022  | 0.367502  |
| O | -1.829525 | 1.114357  | -0.553741 |
| C | -2.171953 | 1.328169  | 1.816031  |
| C | -3.850214 | 2.181838  | 0.082400  |
| H | -1.231038 | 1.849322  | 2.011451  |
| O | -4.590102 | 2.581179  | 0.998199  |
| C | -4.244151 | 2.369004  | -1.366897 |
| H | -4.383366 | 3.432456  | -1.577538 |
| H | -3.455139 | 1.957404  | -1.998544 |
| H | -5.190704 | 1.858015  | -1.561421 |
| H | -2.964004 | 1.728252  | 2.451177  |
| H | -2.017718 | 0.266203  | 2.023553  |

37. TS: (E)-form with diacetyl (T1)

|   | X         | Y         | Z         |
|---|-----------|-----------|-----------|
| C | -0.060610 | -0.733904 | 0.345677  |
| C | 1.035203  | -1.055453 | -0.477830 |
| H | 0.156951  | -0.292793 | 1.310634  |
| H | 0.825143  | -1.545428 | -1.422028 |
| C | -1.354877 | -1.409397 | 0.275123  |
| C | -2.200094 | -1.368621 | 1.398259  |
| C | -1.801773 | -2.089652 | -0.872226 |
| C | -3.443419 | -1.989279 | 1.381198  |
| H | -1.873670 | -0.842668 | 2.289291  |
| C | -3.046393 | -2.705217 | -0.889128 |
| H | -1.184515 | -2.122805 | -1.761215 |
| C | -3.871958 | -2.660544 | 0.236261  |
| H | -4.079381 | -1.947738 | 2.258033  |
| H | -3.378598 | -3.219822 | -1.783602 |
| H | -4.842213 | -3.143502 | 0.218883  |
| C | 2.414727  | -0.763959 | -0.224173 |
| C | 2.897529  | -0.247688 | 1.003782  |
| C | 3.364304  | -1.029729 | -1.241774 |
| C | 4.248142  | -0.001003 | 1.189687  |
| H | 2.209848  | -0.049059 | 1.815954  |
| C | 4.713993  | -0.778708 | -1.050544 |
| H | 3.017917  | -1.429811 | -2.188660 |
| C | 5.165128  | -0.260782 | 0.165954  |
| H | 4.595574  | 0.393077  | 2.137988  |
| H | 5.419205  | -0.984734 | -1.847585 |
| H | 6.220161  | -0.065002 | 0.317922  |
| C | -0.673713 | 2.111648  | 0.012414  |
| O | -0.636335 | 0.957128  | -0.577935 |
| C | 0.341938  | 2.516747  | 1.039097  |
| C | -1.733996 | 3.043303  | -0.362906 |
| H | 1.355383  | 2.326061  | 0.674406  |
| O | -1.797794 | 4.170025  | 0.149407  |
| C | -2.737242 | 2.584672  | -1.402470 |
| H | -2.233179 | 2.351842  | -2.345217 |
| H | -3.242789 | 1.670794  | -1.079584 |
| H | -3.469028 | 3.375888  | -1.563270 |
| H | 0.222534  | 3.576137  | 1.262557  |



H 0.212367 1.957732 1.975310

38. Exciplex: (E)-form with diacetyl (T1)

|   | X         | Y         | Z         |
|---|-----------|-----------|-----------|
| C | -0.145002 | -0.311277 | 0.195838  |
| C | 1.029654  | -0.784931 | -0.599264 |
| H | 0.128222  | -0.215333 | 1.248871  |
| H | 0.808726  | -1.338888 | -1.505073 |
| C | -1.318651 | -1.268999 | 0.079729  |
| C | -1.489803 | -2.270189 | 1.039964  |
| C | -2.204579 | -1.201964 | -0.999134 |
| C | -2.527212 | -3.193075 | 0.923918  |
| H | -0.808785 | -2.329540 | 1.883323  |
| C | -3.245704 | -2.121281 | -1.112157 |
| H | -2.085680 | -0.422364 | -1.742318 |
| C | -3.408976 | -3.119875 | -0.153106 |
| H | -2.650066 | -3.963291 | 1.676995  |
| H | -3.931607 | -2.055603 | -1.949307 |
| H | -4.220710 | -3.832835 | -0.241869 |
| C | 2.386496  | -0.551881 | -0.275665 |
| C | 2.806623  | 0.215481  | 0.847114  |
| C | 3.406026  | -1.102662 | -1.104426 |
| C | 4.151426  | 0.405891  | 1.118359  |
| H | 2.068673  | 0.672686  | 1.494808  |
| C | 4.746212  | -0.906403 | -0.823541 |
| H | 3.113082  | -1.688698 | -1.968980 |
| C | 5.131939  | -0.152193 | 0.290970  |
| H | 4.445227  | 0.998246  | 1.977781  |
| H | 5.500813  | -1.339408 | -1.470664 |
| H | 6.182132  | 0.001278  | 0.509756  |
| C | -1.249319 | 1.868944  | 0.431936  |
| O | -0.489389 | 1.022058  | -0.304429 |
| C | -1.626718 | 1.587997  | 1.845118  |
| C | -1.616837 | 3.096597  | -0.226131 |
| H | -0.747841 | 1.529951  | 2.500360  |
| O | -2.284144 | 3.952969  | 0.375049  |
| C | -1.163897 | 3.314437  | -1.658220 |
| H | -0.074236 | 3.269012  | -1.737108 |
| H | -1.561514 | 2.539950  | -2.320349 |
| H | -1.516266 | 4.291088  | -1.987600 |
| H | -2.253966 | 2.407900  | 2.191899  |
| H | -2.178015 | 0.647925  | 1.946701  |

39. Oxetane: (E)-form with diacetyl (T1)

|   | X         | Y         | Z         |
|---|-----------|-----------|-----------|
| C | -0.683019 | -0.077284 | 0.910498  |
| C | 0.467982  | 0.198096  | -0.087084 |
| H | -0.354986 | -0.660835 | 1.777767  |
| H | 0.072705  | 0.252800  | -1.102278 |
| C | -1.983230 | -0.637804 | 0.394703  |
| C | -1.986427 | -1.855611 | -0.295310 |
| C | -3.194260 | 0.018070  | 0.624902  |
| C | -3.181877 | -2.403862 | -0.752968 |
| H | -1.051543 | -2.375962 | -0.478723 |
| C | -4.390848 | -0.532993 | 0.166420  |
| H | -3.193781 | 0.958556  | 1.162119  |
| C | -4.388851 | -1.742930 | -0.524006 |
| H | -3.171054 | -3.345502 | -1.290573 |
| H | -5.325378 | -0.014357 | 0.349961  |
| H | -5.319387 | -2.168898 | -0.881701 |
| C | 1.727451  | -0.623048 | -0.102635 |
| C | 2.183852  | -1.354868 | 1.001557  |
| C | 2.501564  | -0.644641 | -1.272362 |
| C | 3.371561  | -2.081404 | 0.938476  |
| H | 1.612414  | -1.370390 | 1.922367  |

|   |           |           |           |
|---|-----------|-----------|-----------|
| C | 3.691430  | -1.364061 | -1.336297 |
| H | 2.166221  | -0.085675 | -2.139945 |
| C | 4.131733  | -2.087614 | -0.229077 |
| H | 3.701580  | -2.644714 | 1.804307  |
| H | 4.271894  | -1.363140 | -2.252153 |
| H | 5.055182  | -2.653380 | -0.277035 |
| C | 0.452677  | 1.646684  | 0.557453  |
| O | -0.744078 | 1.324371  | 1.294687  |
| C | 1.600092  | 2.016511  | 1.482215  |
| C | 0.174848  | 2.812866  | -0.428674 |
| H | 1.799062  | 1.216757  | 2.197183  |
| O | 1.229564  | 3.204591  | -1.083462 |
| C | -1.111592 | 2.797208  | -1.235350 |
| H | -1.061324 | 2.095056  | -2.080816 |
| H | -1.923092 | 2.504944  | -0.569333 |
| H | -1.308731 | 3.792958  | -1.636503 |
| H | 2.505471  | 2.205906  | 0.899718  |
| H | 1.342352  | 2.924292  | 2.031062  |
